# Supplementary material for: Glycemic control, HbA1c variability, and major cardiovascular adverse outcomes in type 2 diabetes patients with elevated cardiovascular risk: insights from the ACCORD study
Source: Springer Nature journal article supplement (doi:10.1186/s12933-023-02026-9), 2023-10-27
Supplement: MOESM1 [file 26232276]

**Table S1. Internal Validation Metrics of different categories numbers.**

| Clustering Methods<br>Categories numbers | K-means              |                  | K-medians            |                  |
|------------------------------------------|----------------------|------------------|----------------------|------------------|
|                                          | Davies-Bouldin Index | Silhouette Index | Davies-Bouldin Index | Silhouette Index |
| 2                                        | 0.59                 | 0.56             | 0.60                 | 0.55             |
| 3                                        | 0.57                 | 0.52             | 0.57                 | 0.52             |
| 4                                        | 0.57                 | 0.50             | 0.57                 | 0.49             |
| 5                                        | 2.02                 | 0.38             | 0.57                 | 0.47             |
| 6                                        | 3.40                 | 0.38             | 1.08                 | 0.37             |
| 7                                        | 1.40                 | 0.38             | 0.85                 | 0.33             |
| 8                                        | 1.43                 | 0.23             | 1.27                 | 0.30             |
| 9                                        | 2.25                 | 0.26             | 0.95                 | 0.27             |
| 10                                       | 1.49                 | 0.25             | 3.72                 | 0.31             |

Low values of the Davies-Bouldin Index and high values of the Silhouette Indexes reflected better clustering with less similarity, so the clusters of data show different characteristics.

**Table S2. Baseline characteristics and crude endpoints of the study participants stratified by variability and treatment strategy.**

| K-means Variability Group                                  | Low          |               | Medium       |               | High         |               | Total        |               |
|------------------------------------------------------------|--------------|---------------|--------------|---------------|--------------|---------------|--------------|---------------|
|                                                            | Standard arm | Intensive arm | Standard arm | Intensive arm | Standard arm | Intensive arm | Standard arm | Intensive arm |
| N                                                          | 1660         | 2829          | 2305         | 1624          | 1060         | 574           | 5025         | 5027          |
| Age                                                        | 64.1±6.7     | 63.3±6.5*     | 62.4±6.4     | 62.3±6.7      | 61.5±6.7     | 61.4±6.6      | 62.7±6.6     | 62.7±6.6      |
| Female                                                     | 639(38.5%)   | 1058(37.4%)   | 864(37.5%)   | 635(39.1%)    | 417(39.3%)   | 243(42.3%)    | 1920(38.2%)  | 1936(38.5%)   |
| Race or ethnic group (%)                                   |              |               |              |               |              |               |              |               |
| White                                                      | 1116(67.2%)  | 1886(66.7%)   | 1469(63.7%)  | 948(58.4%)*   | 562(53.0%)   | 300(52.3%)    | 3147(62.6%)  | 3134(62.3%)   |
| Black                                                      | 235(14.2%)   | 433(15.3%)    | 412(17.9%)   | 369(22.7%)    | 280(26.4%)   | 175(30.5%)    | 927(18.4%)   | 977(19.4%)    |
| Hispanic                                                   | 89(5.4%)     | 161(5.7%)     | 159(6.9%)    | 137(8.4%)     | 121(11.4%)   | 52(9.1%)      | 369(7.3%)    | 350(7.0%)     |
| Other                                                      | 220(13.3%)   | 349(12.3%)    | 265(5.6%)    | 170(10.5%)    | 97(9.2%)     | 47(8.2%)      | 582(11.6%)   | 566(11.3%)    |
| CVD History (%)                                            | 528(31.8%)   | 918(32.4%)    | 804(34.9%)   | 628(38.7%)*   | 402(37.9%)   | 236(41.1%)    | 1734(34.5%)  | 1782(35.4%)   |
| Education (%)                                              |              |               |              |               |              |               |              |               |
| Less than high school                                      | 191(11.5%)   | 385(18.6%)    | 322(14.0%)   | 280(17.3%)*   | 172(16.3%)   | 114(19.9%)    | 685(13.6%)   | 779(15.5%)    |
| High-school graduate                                       | 425(25.6%)   | 755(26.7%)    | 616(26.7%)   | 422(26.0%)    | 303(28.5%)   | 142(24.7%)    | 1343(26.7%)  | 1319(26.3%)   |
| Some college                                               | 549(33.1%)   | 917(32.4%)    | 766(33.2%)   | 536(33.0%)    | 343(32.4%)   | 187(32.6%)    | 1658(33.0%)  | 1640(32.6%)   |
| College degree or higher                                   | 494(29.8%)   | 770(27.2%)    | 601(26.1%)   | 385(23.7%)    | 241(22.8%)   | 131(22.8%)    | 1336(26.6%)  | 1286(25.6%)   |
| Baseline HbA <sub>1c</sub> (%)                             | 8.0 ± 0.8    | 8.0 ± 0.9     | 8.4 ± 1.0    | 8.6 ± 1.1*    | 8.7 ± 1.2    | 8.9 ± 1.2*    | 8.3 ± 1.1    | 8.3 ± 1.1     |
| Blood pressure (mm Hg)                                     |              |               |              |               |              |               |              |               |
| Systolic                                                   | 136.3±16.7   | 135.5±16.1    | 136.3±17.1   | 136.8±17.8    | 136.8±18.1   | 137.9±18.3    | 136.4±17.2   | 136.2±17.0    |
| Diastolic                                                  | 74.2±10.3    | 74.5±10.2     | 75.0±10.6    | 74.8±11.0     | 76.0±11.2    | 76.2±11.4     | 75.0±10.7    | 74.8±10.6     |
| Heart rate(BPM)                                            | 71.6±11.6    | 72.2±11.5     | 72.6±11.63   | 73.0±11.8     | 73.8±12.0    | 74.7±12.4     | 72.6±11.7    | 72.7±11.7     |
| Body-mass index                                            | 31.4±5.1     | 32.0±5.3*     | 32.6±5.4     | 32.5±5.5      | 32.7±5.6     | 32.9±5.6      | 32.2±5.4     | 32.2±5.4      |
| Cholesterol (mg/dl)                                        |              |               |              |               |              |               |              |               |
| Total                                                      | 179.7±38.7   | 181.8±40.3    | 185.0±42.6   | 184.7±43.7    | 185.5±43.6   | 187.5±44.9    | 183.3±41.6   | 183.4±42.0    |
| Low-density lipoprotein                                    | 102.9±32.1   | 103.9±32.9    | 105.7±34.2   | 105.5±34.2    | 106.3±35.3   | 107.8±37.7    | 104.9±33.8   | 104.9±33.9    |
| High-density lipoprotein                                   | 43.0±12.0    | 41.8±11.4*    | 41.3±11.0    | 41.8±12.0     | 41.4±11.5    | 42.3±13.2     | 41.9±11.5    | 41.8±11.8     |
| Triglyceride (mg/dl)                                       | 173.5±111.8  | 187.2±132.5*  | 197.1±152.9  | 194.3±162.9   | 199.6±185.7  | 200.1±179.0   | 189.8±149.1  | 190.9±148.7   |
| Fasting serum glucose (mg/dl)                              | 165.2±46.7   | 168.6±48.6*   | 177.8±57.0   | 181.1±60.0    | 188.0±65.8   | 187.1±71.6    | 175.8±56.5   | 174.8±55.9    |
| Estimated GFR, mL *min <sup>-1</sup> *1.73 m <sup>-2</sup> | 90.3±23.4    | 90.6±25       | 91.7±32.8    | 90.7±26.3     | 92.2±25.4    | 92.1±27.4     | 91.4±28.5    | 90.8±25.7     |
| History physical exam (%)                                  |              |               |              |               |              |               |              |               |
| Protein in urine                                           | 295(17.8%)   | 493(17.4%)    | 476(20.7%)   | 357(22.0%)    | 231(21.8%)   | 142(24.7%)    | 1002(19.9%)  | 992(19.7%)    |
| Heart failure                                              | 66(4.0%)     | 107(3.8%)     | 102(4.4%)    | 100(6.2%)*    | 71(6.7%)     | 28(4.9%)      | 239(4.8%)    | 235(4.7%)     |
| Neuropathy                                                 | 423(25.5%)   | 670(23.7%)    | 657(28.5%)   | 442(27.2%)    | 305(28.8%)   | 180(31.4%)    | 1385(27.6%)  | 1292(25.7%)*  |
| Depression                                                 | 323(19.5%)   | 570(20.2%)    | 569(24.7%)   | 426(26.2%)    | 310(29.2%)   | 172(30.0%)    | 1202(23.9%)  | 1168(23.2%)*  |
| Eye disease                                                | 536(32.3%)   | 831(29.4%)*   | 731(31.7%)   | 535(32.9%)    | 337(31.8%)   | 169(29.4%)    | 1604(31.9%)  | 1535(30.5%)   |
| Smoked cigarettes in last 30 days                          | 182(11.0%)   | 357(12.6%)    | 315(13.7%)   | 249(15.3%)    | 190(17.9%)   | 99(17.2%)     | 687(13.7%)   | 705(14.0%)    |
| Crude outcomes (%)                                         |              |               |              |               |              |               |              |               |
| Primary outcome                                            | 145(8.7%)    | 195(6.9%)*    | 258(11.2%)   | 184(11.3%)    | 123(11.6%)   | 110(19.2%)*   | 526(10.5%)   | 489(9.7%)     |
| All-cause mortality                                        | 77(4.6%)     | 139(4.9%)     | 128(5.6%)    | 126(7.8%)*    | 98(9.2%)     | 100(17.4%)*   | 303(6.0%)    | 365(7.3%)*    |
| CVD-mortality                                              | 30(1.8%)     | 63(2.2%)      | 56(2.4%)     | 62(3.8%)*     | 45(4.2%)     | 50(8.7%)*     | 131(2.6%)    | 175(3.52%)*   |
| Non-fatal MI                                               | 94(5.7%)     | 119(4.2%)*    | 179(7.8%)    | 114(7.0%)     | 66(6.2%)     | 52(9.1%)*     | 339(6.7%)    | 285(5.7%)*    |
| Non-fatal Stroke                                           | 28(1.7%)     | 28(1.0%)*     | 39(1.7%)     | 29(1.8%)      | 26(2.5%)     | 43(4.0%)      | 93(1.9%)     | 80(1.6%)      |

|              |          |           |          |          |          |          |           |          |
|--------------|----------|-----------|----------|----------|----------|----------|-----------|----------|
| Total Stroke | 31(1.9%) | 32(1.1%)* | 44(1.9%) | 33(2.0%) | 28(2.6%) | 24(4.2%) | 103(2.0%) | 89(1.8%) |
|--------------|----------|-----------|----------|----------|----------|----------|-----------|----------|

\*, Statistically significant compared to the standard management approach, P<0.05. CVD, cardiovascular diseases; HbA1c, Hemoglobin A1c; HVS, HbA1c variability score; GFR, glomerular filtration rate; MI, myocardial infarction. Plus-minus values are means  $\pm$  SD. Race and ethnic group were self-reported. The body mass index is the weight in kilograms divided by the square of the height in meters.

**Table S3. The cut-off value of classification of HbA1c variability**

| Clustering Methods      | Number in Group (%) |                    |                  |
|-------------------------|---------------------|--------------------|------------------|
| Quantile partitioning   | Low Variability     | Medium Variability | High Variability |
| HVS                     | 3430(34.1%)         | 3331(33.1%)        | 3291(32.8%)      |
| SD                      | 3351(33.3%)         | 3351(33.3%)        | 3350(33.3%)      |
| Machine learning models |                     |                    |                  |
| K-means                 | 4489(44.7%)         | 3929(39.1%)        | 1634(16.3%)      |
| K-medians               | 3820(38%)           | 3783(37.6%)        | 2449(24.4%)      |
|                         |                     | Mean HVS           |                  |
| Quantile partitioning   | Low Variability     | Medium Variability | High Variability |
| HVS                     | 15.87 ± 7.25        | 36.58 ± 5.78       | 64.70 ± 14.78    |
| SD                      | 25.12 ± 17.66       | 38.87 ± 19.03      | 52.17 ± 21.54    |
| Machine learning models |                     |                    |                  |
| K-means                 | 19.29 ± 8.92        | 45.44 ± 8.26       | 75.95 ± 13.01    |
| K-medians               | 17.19 ± 7.92        | 40.63 ± 7.45       | 69.35 ± 14.38    |
|                         |                     | Mean SD            |                  |
| Quantile partitioning   | Low Variability     | Medium Variability | High Variability |
| HVS                     | 0.53 ± 0.23         | 0.69 ± 0.26        | 0.92 ± 0.39      |
| SD                      | 0.41 ± 0.09         | 0.64 ± 0.07        | 1.08 ± 0.32      |
| Machine learning models |                     |                    |                  |
| K-means                 | 0.53 ± 0.21         | 0.77 ± 0.28        | 1.06 ± 0.42      |
| K-medians               | 0.52 ± 0.22         | 0.70 ± 0.24        | 1.02 ± 0.39      |

**Table S4. Classification of HbA1c variability**

| Clustering Methods      | Baseline HbA1c (%)  |                    |                     |                    |                     |                    |
|-------------------------|---------------------|--------------------|---------------------|--------------------|---------------------|--------------------|
|                         | Low Variability     |                    | Medium Variability  |                    | High Variability    |                    |
|                         | Intensive treatment | Standard Treatment | Intensive treatment | Standard Treatment | Intensive treatment | Standard Treatment |
| Quantile partitioning   |                     |                    |                     |                    |                     |                    |
| HVS                     | 8.03 ± 0.94*        | 7.91 ± 0.83        | 8.36 ± 1.04*        | 8.25 ± 0.98        | 8.73 ± 1.14*        | 8.57 ± 1.14        |
| SD                      | 7.55 ± 0.57*        | 7.79 ± 0.63        | 8.15 ± 0.67*        | 8.24 ± 0.83        | 9.15 ± 1.13*        | 8.92 ± 1.27        |
| Machine learning models |                     |                    |                     |                    |                     |                    |
| K-means                 | 8.01 ± 0.92*        | 7.95 ± 0.82        | 8.57 ± 1.07*        | 8.37 ± 1.03        | 8.91 ± 1.19*        | 8.74 ± 1.22        |
| K-medians               | 8.00 ± 0.92*        | 7.91 ± 0.80        | 8.40 ± 1.03*        | 8.28 ± 0.97        | 8.92 ± 1.17*        | 8.69 ± 1.20        |
|                         | Mean HbA1c (%)      |                    |                     |                    |                     |                    |
|                         | Low Variability     |                    | Medium Variability  |                    | High Variability    |                    |
|                         | Intensive treatment | Standard Treatment | Intensive treatment | Standard Treatment | Intensive treatment | Standard Treatment |
| Quantile partitioning   |                     |                    |                     |                    |                     |                    |
| HVS                     | 6.55 ± 0.50*        | 7.40 ± 0.52        | 6.93 ± 0.59*        | 7.65 ± 0.58        | 7.61 ± 0.84*        | 8.06 ± 0.78        |
| SD                      | 6.68 ± 0.59*        | 7.50 ± 0.52        | 6.78 ± 0.63         | 7.70 ± 0.59        | 7.26 ± 0.86         | 8.11 ± 0.84        |
| Machine learning models |                     |                    |                     |                    |                     |                    |
| K-means                 | 6.59 ± 0.52*        | 7.45 ± 0.53        | 7.13 ± 0.66*        | 7.75 ± 0.61        | 7.86 ± 0.87*        | 8.28 ± 0.85        |
| K-medians               | 6.56 ± 0.51*        | 7.42 ± 0.51        | 6.99 ± 0.61*        | 7.69 ± 0.59        | 7.73 ± 0.85*        | 8.16 ± 0.81        |
|                         | HVS                 |                    |                     |                    |                     |                    |
|                         | Low Variability     |                    | Medium Variability  |                    | High Variability    |                    |
|                         | Intensive treatment | Standard Treatment | Intensive treatment | Standard Treatment | Intensive treatment | Standard Treatment |
| Quantile partitioning   |                     |                    |                     |                    |                     |                    |
| HVS                     | 15.76 ± 6.80        | 16.10 ± 8.09       | 35.78 ± 5.76*       | 37.30 ± 5.71       | 65.19 ± 16.33       | 64.44 ± 13.87      |
| SD                      | 21.74 ± 16.83*      | 28.34 ± 17.83      | 31.97 ± 18.14*      | 45.97 ± 17.22      | 45.76 ± 22.33*      | 58.74 ± 18.54      |
| Machine learning models |                     |                    |                     |                    |                     |                    |
| K-means                 | 18.36 ± 8.29*       | 20.88 ± 9.68       | 43.65 ± 8.06*       | 46.69 ± 8.18       | 77.54 ± 14.50*      | 75.08 ± 12.04      |
| K-medians               | 16.68 ± 7.36*       | 18.14 ± 8.81       | 38.99 ± 7.26*       | 41.92 ± 7.34       | 69.66 ± 16.21       | 69.17 ± 13.26      |
|                         | SD                  |                    |                     |                    |                     |                    |
|                         | Low Variability     |                    | Medium Variability  |                    | High Variability    |                    |
|                         | Intensive treatment | Standard Treatment | Intensive treatment | Standard Treatment | Intensive treatment | Standard Treatment |
| Quantile partitioning   |                     |                    |                     |                    |                     |                    |
| HVS                     | 0.57 ± 0.23*        | 0.44 ± 0.19        | 0.74 ± 0.28*        | 0.64 ± 0.24        | 0.97 ± 0.42*        | 0.89 ± 0.36        |
| SD                      | 0.42 ± 0.09*        | 0.40 ± 0.09        | 0.64 ± 0.07         | 0.64 ± 0.07        | 1.08 ± 0.32         | 1.08 ± 0.31        |
| Machine learning models |                     |                    |                     |                    |                     |                    |
| K-means                 | 0.58 ± 0.22*        | 0.46 ± 0.18        | 0.83 ± 0.31*        | 0.72 ± 0.25        | 1.09 ± 0.46*        | 1.04 ± 0.40        |
| K-medians               | 0.57 ± 0.22*        | 0.44 ± 0.18        | 0.75 ± 0.26*        | 0.66 ± 0.22        | 1.07 ± 0.43*        | 0.99 ± 0.37        |

\*The difference was statistically significant compared to the standard treatment group.

**Table S5. Comparison of Internal Validation Metrics.**

| Performance Index       | Calinski-Harabaz Index | Davies-Bouldin Index | Silhouette Index |
|-------------------------|------------------------|----------------------|------------------|
| Clustering Methods      |                        |                      |                  |
| Quantile partitioning   |                        |                      |                  |
| HVS                     | 20024.318              | 0.577                | 0.506            |
| SD                      | 1617.038               | 2.313                | 0.002            |
| Machine learning models |                        |                      |                  |
| K-means                 | 23041.551              | 0.570                | 0.523            |
| K-medians               | 21451.039              | 0.597                | 0.499            |

Low values of the Davies-Bouldin Index and high values of the Calinski-Harabaz and Silhouette Indexes reflected better clustering with less similarity, so the clusters of data show different characteristics.

**Table S6. Comparing Risk of Different Outcomes Among Participants with Different levels of HbA1c variability.**

| HbA <sub>1c</sub> Variability Levels | Medium vs Low     |                | High vs Low       |                |
|--------------------------------------|-------------------|----------------|-------------------|----------------|
|                                      | HR (95% CI)       | <i>P</i> Value | HR (95% CI)       | <i>P</i> Value |
| Primary outcome                      |                   |                |                   |                |
| Quantile partitioning                |                   |                |                   |                |
| HVS                                  | 1.21 (1.02, 1.43) | 0.03           | 2.12 (1.79, 2.50) | <0.01          |
| SD                                   | 1.16 (0.99, 1.36) | 0.08           | 1.56 (1.33, 1.82) | <0.01          |
| Machine learning models              |                   |                |                   |                |
| K-means                              | 1.54 (1.33, 1.79) | <0.01          | 2.38 (1.99, 2.84) | <0.01          |
| K-medians                            | 1.37 (1.17, 1.60) | <0.01          | 2.23 (1.88, 2.65) | <0.01          |
| All-cause mortality                  |                   |                |                   |                |
| Quantile partitioning                |                   |                |                   |                |
| HVS                                  | 1.35 (1.09, 1.68) | <0.01          | 3.01 (2.45, 3.70) | <0.01          |
| SD                                   | 0.96 (0.79, 1.18) | 0.72           | 1.52 (1.26, 1.84) | <0.01          |
| Machine learning models              |                   |                |                   |                |
| K-means                              | 1.55 (1.28, 1.87) | <0.01          | 3.76 (3.06, 4.64) | <0.01          |
| K-medians                            | 1.61 (1.31, 1.96) | <0.01          | 3.38 (2.75, 4.17) | <0.01          |
| Hypoglycemic events                  |                   |                |                   |                |
| Quantile partitioning                |                   |                |                   |                |
| HVS                                  | 1.32(1.14, 1.52)  | <0.01          | 1.78(1.53, 2.06)  | <0.01          |
| SD                                   | 1.26(1.09, 1.46)  | <0.01          | 1.55(1.34, 1.79)  | <0.01          |
| Machine learning models              |                   |                |                   |                |
| K-means                              | 1.46(1.29, 1.66)  | <0.01          | 1.88(1.59, 2.23)  | <0.01          |
| K-medians                            | 1.40(1.23, 1.61)  | <0.01          | 1.87(1.61, 2.18)  | <0.01          |

**Table S7. The HRs for outcomes in participants randomized to the intensive compared with the standard blood glucose treatment group, stratified by HbA1c variability levels.**

| K-means Variability Group | HR (95% CI) for Intensive Treatment | <i>P</i> Value | <i>P</i> for interaction |
|---------------------------|-------------------------------------|----------------|--------------------------|
| <b>CVD death</b>          |                                     |                |                          |
| Low                       | 1.23(0.78,1.91)                     | 0.36           | 0.04                     |
| Medium                    | 1.55(1.08,2.23)                     | 0.02           |                          |
| High                      | 2.48(1.64,3.75)                     | <0.01          |                          |
| <b>Non-Fatal MI</b>       |                                     |                |                          |
| Low                       | 0.73(0.56,0.97)                     | 0.03           | <0.01                    |
| Medium                    | 0.88(0.69,1.11)                     | 0.29           |                          |
| High                      | 1.71(1.19,2.47)                     | <0.01          |                          |
| <b>Non-Fatal Stroke</b>   |                                     |                |                          |
| Low                       | 0.63(0.38,1.03)                     | 0.07           | 0.03                     |
| Medium                    | 1.11(0.70,1.76)                     | 0.66           |                          |
| High                      | 1.70(0.97,2.96)                     | 0.06           |                          |

CVD death, mortality caused by cardiovascular reasons. MI, myocardial infarction



**Table S8. The Hypoglycemia events in participants randomized to the intensive compared with the standard blood glucose treatment group, stratified by HbA1c variability levels.**

| Clustering Methods             | Hypoglycemic events |                    |                                 |                    |                                     |         |                   |                              |
|--------------------------------|---------------------|--------------------|---------------------------------|--------------------|-------------------------------------|---------|-------------------|------------------------------|
|                                | Events/Total(n)     |                    | Event rate(per 100 person year) |                    | HR (95% CI) for Intensive Treatment | P Value | P for interaction | P for interaction trend test |
|                                | Intensive treatment | Standard Treatment | Intensive treatment             | Standard Treatment |                                     |         |                   |                              |
| <b>Quantile partitioning</b>   |                     |                    |                                 |                    |                                     |         |                   |                              |
| HVS                            |                     |                    |                                 |                    |                                     |         |                   |                              |
| Low                            | 350                 | 38                 | 3.35                            | 0.71               | 4.92 (3.52, 6.89)                   | <0.01   |                   |                              |
| Medium                         | 304                 | 115                | 4.56                            | 1.33               | 3.30 (2.66, 4.10)                   | <0.01   | 0.02              | <0.01                        |
| High                           | 241                 | 183                | 5.97                            | 1.92               | 2.88 (2.36, 3.50)                   | <0.01   |                   |                              |
| SD                             |                     |                    |                                 |                    |                                     |         |                   |                              |
| Low                            | 254                 | 82                 | 3.64                            | 1.03               | 3.50 (2.73, 4.50)                   | <0.01   |                   |                              |
| Medium                         | 314                 | 111                | 4.30                            | 1.40               | 3.04 (2.44, 3.78)                   | <0.01   | 0.14              | 0.05                         |
| High                           | 327                 | 143                | 4.76                            | 1.88               | 2.56 (2.10, 3.12)                   | <0.01   |                   |                              |
| <b>Machine learning models</b> |                     |                    |                                 |                    |                                     |         |                   |                              |
| K-means                        |                     |                    |                                 |                    |                                     |         |                   |                              |
| Low                            | 439                 | 69                 | 3.46                            | 0.86               | 4.12(3.19, 5.31)                    | <0.01   |                   |                              |
| Medium                         | 337                 | 168                | 5.10                            | 1.53               | 3.20(2.65, 3.86)                    | <0.01   | 0.06              | 0.02                         |
| High                           | 119                 | 99                 | 6.39                            | 2.19               | 2.69(2.05, 3.54)                    | <0.01   |                   |                              |
| K-medians                      |                     |                    |                                 |                    |                                     |         |                   |                              |
| Low                            | 379                 | 47                 | 3.38                            | 0.74               | 4.78(3.53, 6.48)                    | <0.01   |                   |                              |
| Medium                         | 328                 | 152                | 4.75                            | 1.50               | 3.03(2.49, 3.68)                    | <0.01   | 0.01              | 0.02                         |
| High                           | 188                 | 137                | 6.21                            | 1.98               | 2.99(2.38, 3.74)                    | <0.01   |                   |                              |

**Table S9. Results of two-piecewise linear regression for hypoglycemic events.**

| K-means Variability Group             | Hypoglycemic events              |                                  |                                  |                                  |
|---------------------------------------|----------------------------------|----------------------------------|----------------------------------|----------------------------------|
|                                       | Low Variability                  | Medium Variability               | High Variability                 | Total                            |
| Mean Value of HbA1c                   |                                  |                                  |                                  | <i>P</i> for interaction<0.01    |
| One linear-regression model           | 0.72 (0.63, 0.83) <i>P</i> <0.01 | 0.93 (0.82, 1.06) <i>P</i> =0.30 | 1.01 (0.86,1.20) <i>P</i> =0.88  | 0.86 (0.80, 0.94) <i>P</i> <0.01 |
| Two-piecewise linear-regression model |                                  |                                  |                                  |                                  |
| Inflection point (K) (%)              | 6.42                             | 7.69                             | 8.45                             | 7.79                             |
| <K Effect size $\beta$ (95%CI)        | 1.86 (1.00, 3.47) <i>P</i> =0.05 | 0.53 (0.44, 0.65) <i>P</i> <0.01 | 0.69 (0.52, 0.91) <i>P</i> =0.01 | 0.63 (0.57, 1.71) <i>P</i> <0.01 |
| >K Effect size $\beta$ (95%CI)        | 0.59 (0.48, 0.71) <i>P</i> <0.01 | 1.92 (1.56, 2.36) <i>P</i> <0.01 | 1.54 (1.17, 2.04) <i>P</i> <0.01 | 1.42 (1.24, 1.64) <i>P</i> <0.01 |
| Log-likelihood ratio test             | <0.01                            | <0.01                            | <0.01                            | <0.01                            |

**Table S10. Sensitive analysis by excluding participants who had a follow-up time of fewer than 1 year.**

| Clustering Methods      | Primary Outcome                     |                |                          | All-cause Mortality                 |                |                          |
|-------------------------|-------------------------------------|----------------|--------------------------|-------------------------------------|----------------|--------------------------|
|                         | HR (95% CI) for Intensive Treatment | <i>P</i> Value | <i>P</i> for interaction | HR (95% CI) for Intensive Treatment | <i>P</i> Value | <i>P</i> for interaction |
| Quantile partitioning   |                                     |                |                          |                                     |                |                          |
| HVS                     |                                     |                | <0.01                    |                                     |                | 0.22                     |
| Low                     | 0.76 (0.57, 1.00)                   | 0.05           |                          | 1.29 (0.88, 1.89)                   | 0.19           |                          |
| Medium                  | 0.84 (0.66, 1.07)                   | 0.16           |                          | 1.39 (1.03, 1.87)                   | 0.03           |                          |
| High                    | 1.48 (1.19, 1.83)                   | <0.01          |                          | 1.73 (1.35, 2.23)                   | <0.01          |                          |
| SD                      |                                     |                | 0.48                     |                                     |                | 0.12                     |
| Low                     | 0.79 (0.60, 1.02)                   | 0.08           |                          | 0.99 (0.72, 1.35)                   | 0.93           |                          |
| Medium                  | 0.83 (0.66, 1.05)                   | 0.13           |                          | 1.09 (0.81, 1.47)                   | 0.57           |                          |
| High                    | 0.98 (0.79, 1.22)                   | 0.87           |                          | 1.47 (1.13, 1.90)                   | <0.01          |                          |
| Machine learning models |                                     |                |                          |                                     |                |                          |
| K-means                 |                                     |                | <0.01                    |                                     |                | <0.01                    |
| Low                     | 0.74 (0.58, 0.94)                   | 0.01           |                          | 1.14 (0.84, 1.54)                   | 0.40           |                          |
| Medium                  | 0.98 (0.80, 1.21)                   | 0.87           |                          | 1.44 (1.11, 1.88)                   | <0.01          |                          |
| High                    | 1.94 (1.44, 2.60)                   | <0.01          |                          | 2.23 (1.62, 3.08)                   | <0.01          |                          |
| K-medians               |                                     |                | <0.01                    |                                     |                | 0.09                     |
| Low                     | 0.74 (0.57, 0.96)                   | 0.02           |                          | 1.38 (0.96, 1.98)                   | 0.08           |                          |
| Medium                  | 0.91 (0.73, 1.14)                   | 0.41           |                          | 1.29 (0.99, 1.69)                   | 0.06           |                          |
| High                    | 1.60 (1.25, 2.05)                   | <0.01          |                          | 1.95 (1.47, 2.58)                   | <0.01          |                          |

**Table S11. Sensitive analysis of two-piecewise linear regression by excluding participants who had a follow-up time of fewer than 1 year.**

| <b>Primary Outcome</b>                |                                |                                |                                 |                                |
|---------------------------------------|--------------------------------|--------------------------------|---------------------------------|--------------------------------|
| K-means Variability Group             | Low Variability                | Medium Variability             | High Variability                | Total                          |
| Mean Value of HbA1c                   |                                |                                |                                 | <i>P</i> for interaction: 0.02 |
| One linear-regression model           | 1.37(1.16,1.63) <i>P</i> <0.01 | 1.11(0.96,1.29) <i>P</i> =0.16 | 1.03(0.86,1.23) <i>P</i> =0.73  | 1.16(1.06,1.28) <i>P</i> <0.01 |
| Two-piecewise linear-regression model |                                |                                |                                 |                                |
| Inflection point (K) (%)              | 6.54                           | 6.70                           | 9.35                            | 8.79                           |
| <K Effect size $\beta$ (95%CI)        | 1.06(0.53,2.11) <i>P</i> =0.87 | 0.43(0.20,0.92) <i>P</i> =0.03 | 1.08(0.87,1.35) <i>P</i> =0.47  | 1.21(1.08,1.36) <i>P</i> <0.01 |
| >K Effect size $\beta$ (95%CI)        | 1.45(1.16,1.81) <i>P</i> <0.01 | 1.23(1.04,1.46) <i>P</i> <0.01 | 0.769(0.33,1.78) <i>P</i> =0.53 | 0.89(0.61,1.32) <i>P</i> =0.57 |
| Log-likelihood ratio test             | 0.45                           | 0.02                           | 0.45                            | 0.15                           |
| <b>All-cause Mortality</b>            |                                |                                |                                 |                                |
| K-means Variability Group             | Low Variability                | Medium Variability             | High Variability                | Total                          |
| Mean Value of HbA1c                   |                                |                                |                                 | <i>P</i> for interaction <0.01 |
| One linear-regression model           | 1.12(0.90,1.39) <i>P</i> =0.31 | 0.85(0.69,1.03) <i>P</i> =0.10 | 0.89(0.72,1.09) <i>P</i> =0.24  | 0.98(0.88,1.09) <i>P</i> =0.65 |
| Two-piecewise linear-regression model |                                |                                |                                 |                                |
| Inflection point (K and 95%CI) (%)    | 5.99                           | 7.43                           | 7.24                            | 6.11(6.10,6.43)                |
| <K Effect size $\beta$ (95%CI)        | None                           | 0.46(0.33,0.65) <i>P</i> <0.01 | 0.57(0.23,1.41) <i>P</i> =0.22  | None                           |
| >K Effect size $\beta$ (95%CI)        | 1.08(0.86,1.36) <i>P</i> =0.52 | 1.51(1.10,2.07) <i>P</i> <0.01 | 0.94(0.74,1.19) <i>P</i> =0.60  | 0.95(0.85,1.07) <i>P</i> =0.14 |
| Log-likelihood ratio test             | 0.31                           | <0.01                          | 0.35                            | 0.10                           |

**Table S12. Sensitive analysis by clustering by HVS and VIM.**

| K-means Variability Group<br>(Clustering by HVS and VIM) | Events/Total(n)  |                 | HR (95% CI) for Intensive<br>Treatment | <i>P</i> Value | <i>P</i> for interaction | <i>P</i> for interaction trend<br>test |
|----------------------------------------------------------|------------------|-----------------|----------------------------------------|----------------|--------------------------|----------------------------------------|
|                                                          | Intensive<br>arm | Standard<br>arm |                                        |                |                          |                                        |
| Primary outcomes                                         |                  |                 |                                        |                |                          |                                        |
| Low                                                      | 190/2742         | 145/1600        | 0.75 (0.60, 0.94)                      | 0.01           |                          |                                        |
| Medium                                                   | 172/1647         | 247/2221        | 0.94 (0.77, 1.14)                      | 0.51           | <0.01                    | <0.01                                  |
| High                                                     | 102/550          | 121/1126        | 2.01 (1.54, 2.63)                      | <0.01          |                          |                                        |
| All-cause Mortality                                      |                  |                 |                                        |                |                          |                                        |
| Low                                                      | 138/2742         | 72/1600         | 1.14 (0.85, 1.52)                      | 0.39           |                          |                                        |
| Medium                                                   | 115/1647         | 121/2221        | 1.32 (1.02, 1.70)                      | 0.04           | <0.01                    | <0.01                                  |
| High                                                     | 83/550           | 91/1126         | 2.23 (1.64, 3.02)                      | <0.01          |                          |                                        |

VIM, variation independent of the mean.

**Table S13. Sensitive analysis of two-piecewise linear regression by clustering by HVS and VIM.**

| K-means Variability Group<br>(clustering by HVS and VIM) | Primary Outcome                  |                                  |                                  |                                  |
|----------------------------------------------------------|----------------------------------|----------------------------------|----------------------------------|----------------------------------|
|                                                          | Low Variability                  | Medium Variability               | High Variability                 | Total                            |
| Mean Value of HbA1c                                      |                                  |                                  |                                  | <i>P</i> for interaction: 0.07   |
| One linear-regression model                              | 1.34 (1.15, 1.57) <i>P</i> <0.01 | 1.20 (1.05,1.37) <i>P</i> =0.01  | 1.08(0.92,1.26) <i>P</i> =0.37   | 1.20 (1.10, 1.31) <i>P</i> <0.01 |
| Two-piecewise linear-regression model                    |                                  |                                  |                                  |                                  |
| Inflection point (K) (%)                                 | 6.74                             | 7.49                             | 7.85                             | 8.79                             |
| <K Effect size $\beta$ (95%CI)                           | 1.13 (0.70, 1.83) <i>P</i> =0.61 | 1.03 (0.79, 1.34) <i>P</i> =0.85 | 0.78 (0.54,1.14) <i>P</i> =0.20  | 1.22 (1.10,1.35) <i>P</i> <0.01  |
| >K Effect size $\beta$ (95%CI)                           | 1.43 (1.14, 1.80) <i>P</i> <0.01 | 1.35 (1.09,1.66) <i>P</i> <0.01  | 1.25 (1.00, 1.56) <i>P</i> =0.05 | 1.10 (0.80, 1.51) <i>P</i> =0.56 |
| Log-likelihood ratio test                                | 0.47                             | 0.2                              | 0.08                             | 0.56                             |
| K-means Variability Group<br>(clustering by HVS and VIM) | All-cause Mortality              |                                  |                                  |                                  |
|                                                          | Low Variability                  | Medium Variability               | High Variability                 | Total                            |
| Mean Value of HbA1c                                      |                                  |                                  |                                  | <i>P</i> for interaction :0.09   |
| One linear-regression model                              | 1.18 (0.96, 1.44) <i>P</i> =0.12 | 0.98 (0.82, 1.19) <i>P</i> =0.87 | 0.89 (0.73, 1.08) <i>P</i> =0.23 | 1.00 (0.90, 1.12) <i>P</i> =0.98 |
| Two-piecewise linear-regression model                    |                                  |                                  |                                  |                                  |
| Inflection point (K and 95%CI) (%)                       | 5.99                             | 7.56                             | 7.25                             | 6.12                             |
| <K Effect size $\beta$ (95%CI)                           | None                             | 0.65 (0.48, 0.88) <i>P</i> <0.01 | 0.42 (0.21, 0.85) <i>P</i> =0.01 | None                             |
| >K Effect size $\beta$ (95%CI)                           | 1.14 (0.91, 1.41) <i>P</i> =0.25 | 1.54 (1.13, 2.10) <i>P</i> <0.01 | 1.02 (0.81, 1.27) <i>P</i> =0.89 | 0.98 (0.87, 1.10) <i>P</i> =0.69 |
| Log-likelihood ratio test                                | 0.33                             | <0.01                            | 0.04                             | 0.12                             |

VIM, variation independent of the mean.

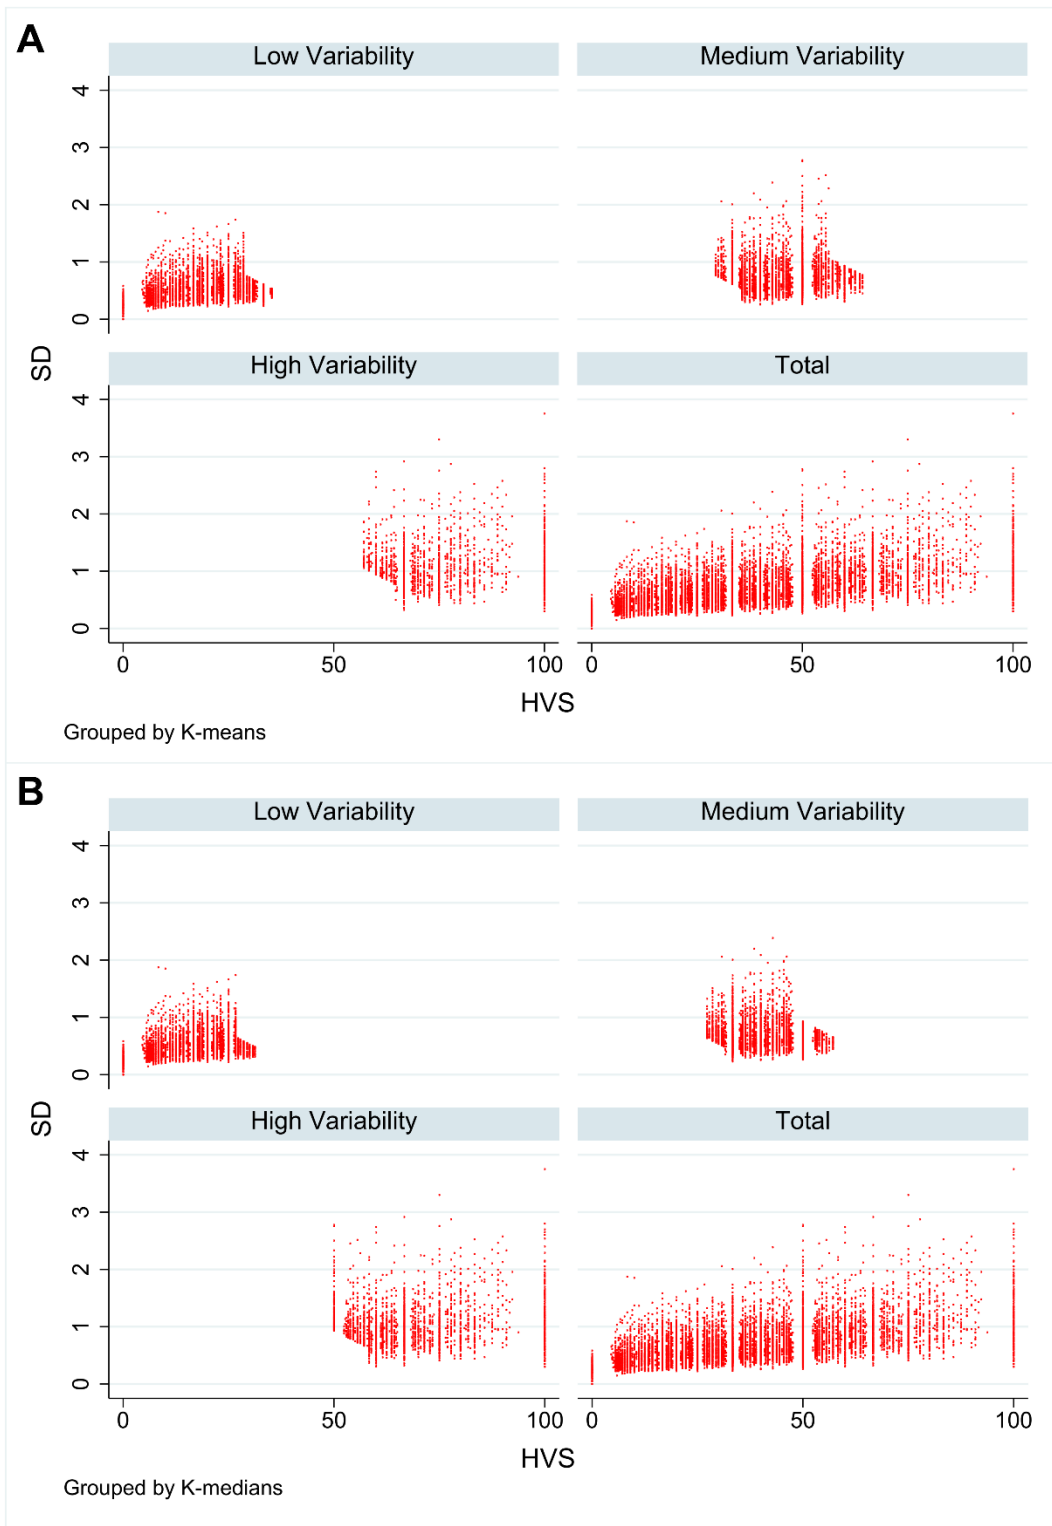

**Figure S1. Clustering results for each algorithm.**  
 A. Grouping by K-means. B. Grouping by K-medians.

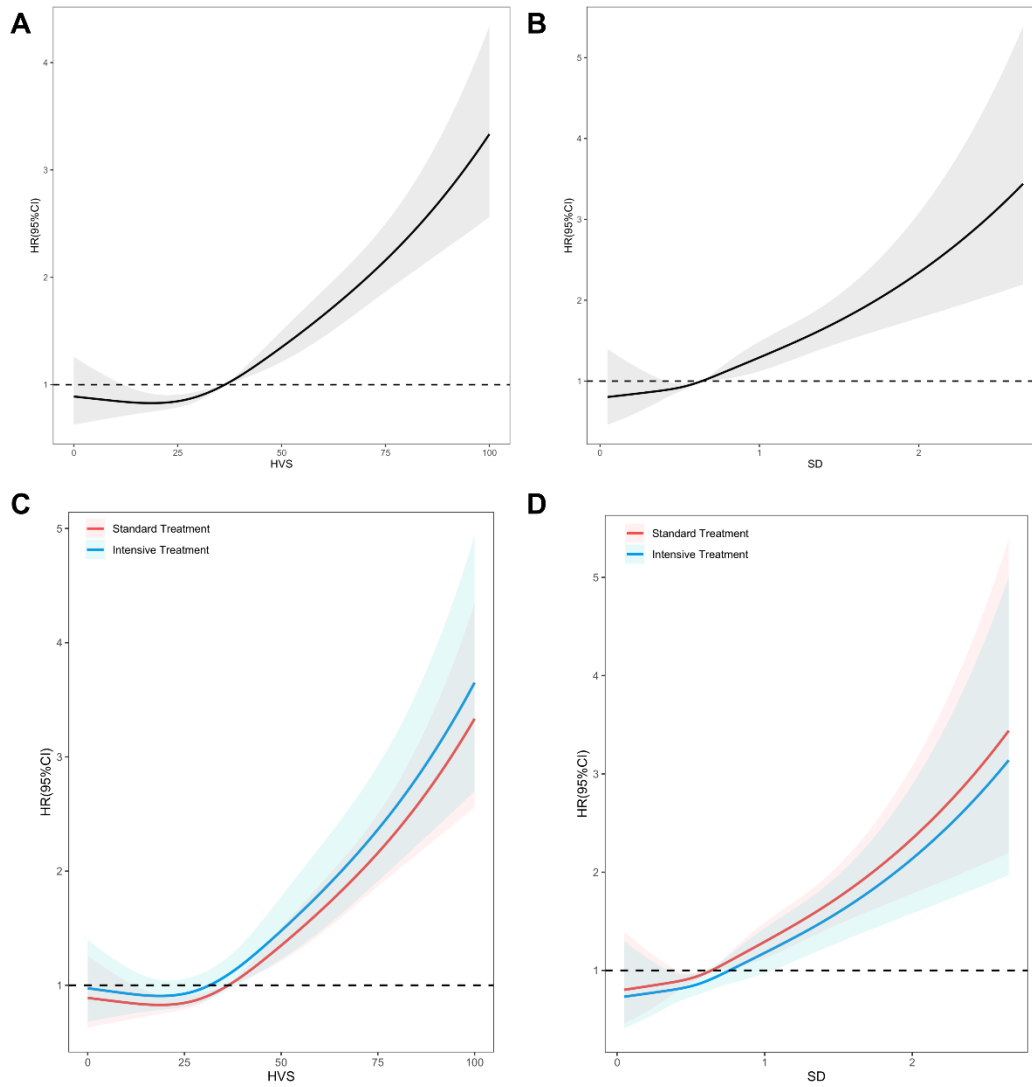

**Figure S2. Relationship between HVD, SD, and primary outcome.**  
 The solid line is the hazard ratio, the region is 95% CI.



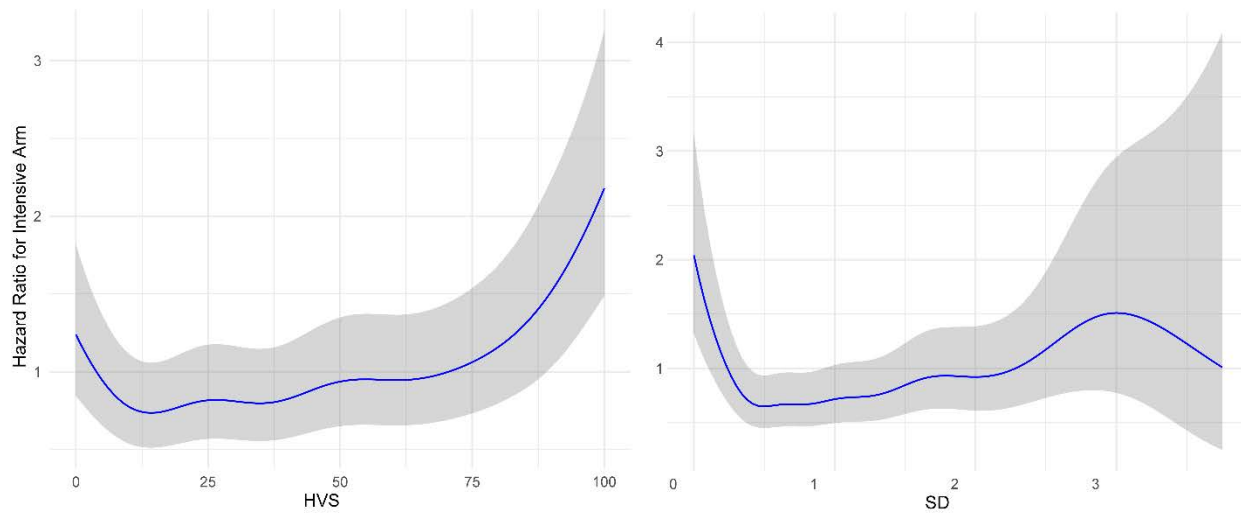

**Figure S3. The effect of intensive vs. standard blood glucose management across the spectrum of HVS and SD for MACEs.**

The solid blue lines represent the hazard ratio at each baseline HVS and SD interval. The grey range represent the upper and lower bounds of the 95% confidence interval.

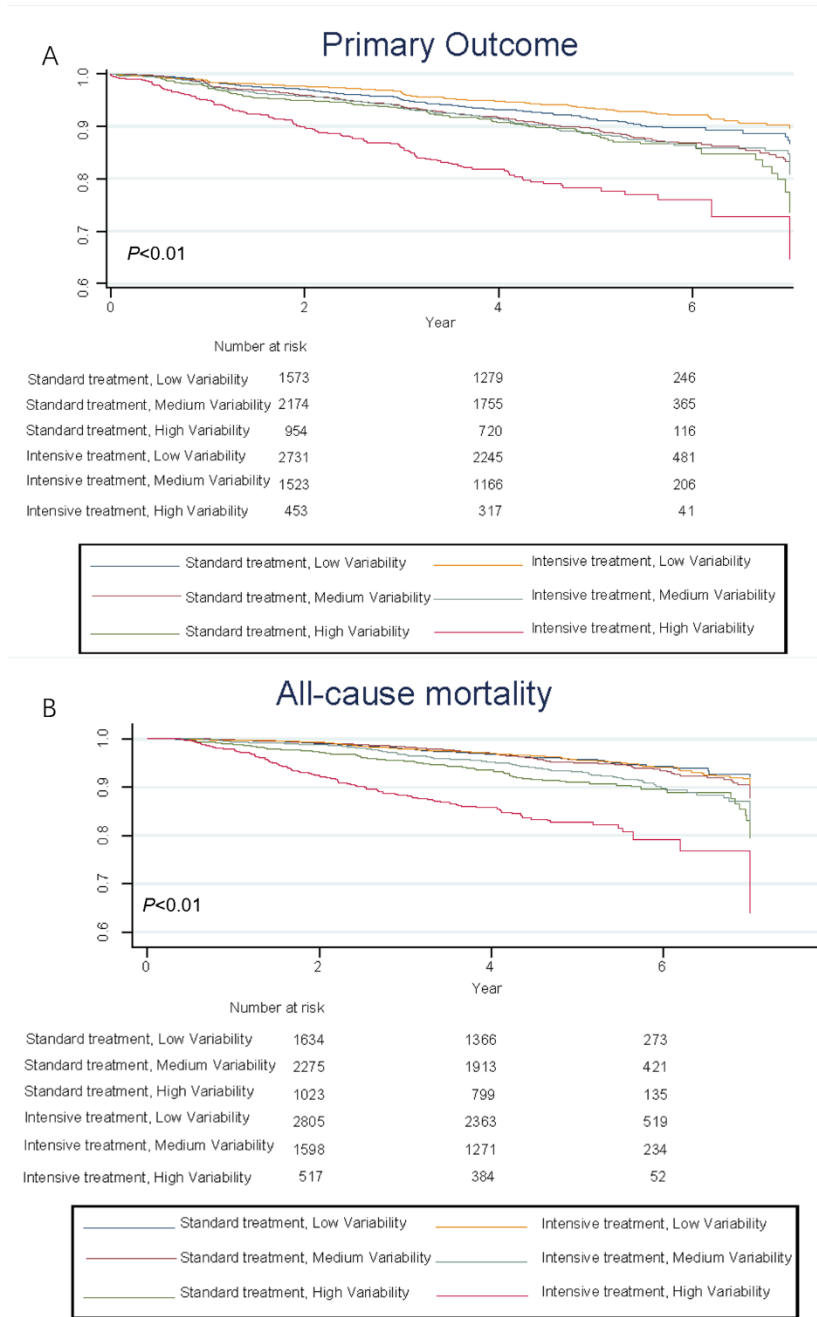

**Figure S4. Kaplan-Meier survival curve for the primary outcome and all-cause mortality grouped by intensive treatment and HbA1c variability levels.**

### Non-related to Hypoglycemia Serious Adverse Event

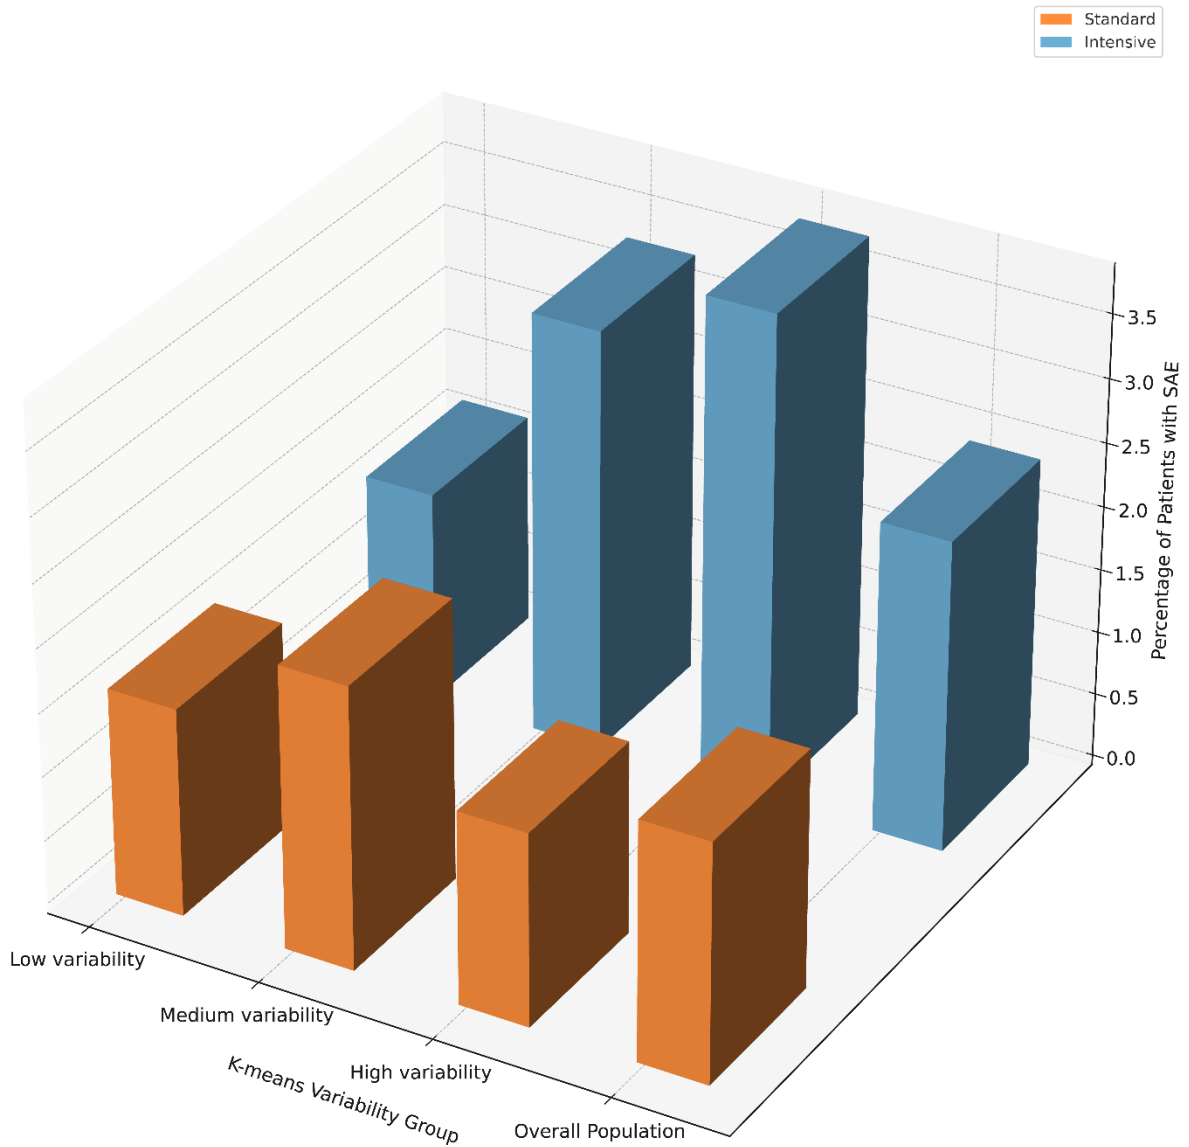

| K-means Cluster | Low Variability | Medium Variability | High Variability | Overall population | P Value* |
|-----------------|-----------------|--------------------|------------------|--------------------|----------|
| Standard arm    | 27 (1.62%)      | 51 (2.21%)         | 16 (1.51%)       | 94 (1.87%)         | 0.25     |
| Intensive arm   | 47 (1.66%)      | 54 (3.31%)         | 22 (3.81%)       | 123 (2.44%)        | <0.01    |
| P Value#        | 0.46            | 0.02               | <0.01            | 0.02               | 0.02\$   |

**Figure S5. The non-related to hypoglycemia serious adverse event in participants randomized to the intensive compared with the standard blood glucose treatment group, stratified by HbA1c variability levels.**

\* Difference among variability group,

# Standard arm vs. Intensive arm,

P value was calculated by Fisher's exact z-test.

\$ P for interaction trend test.

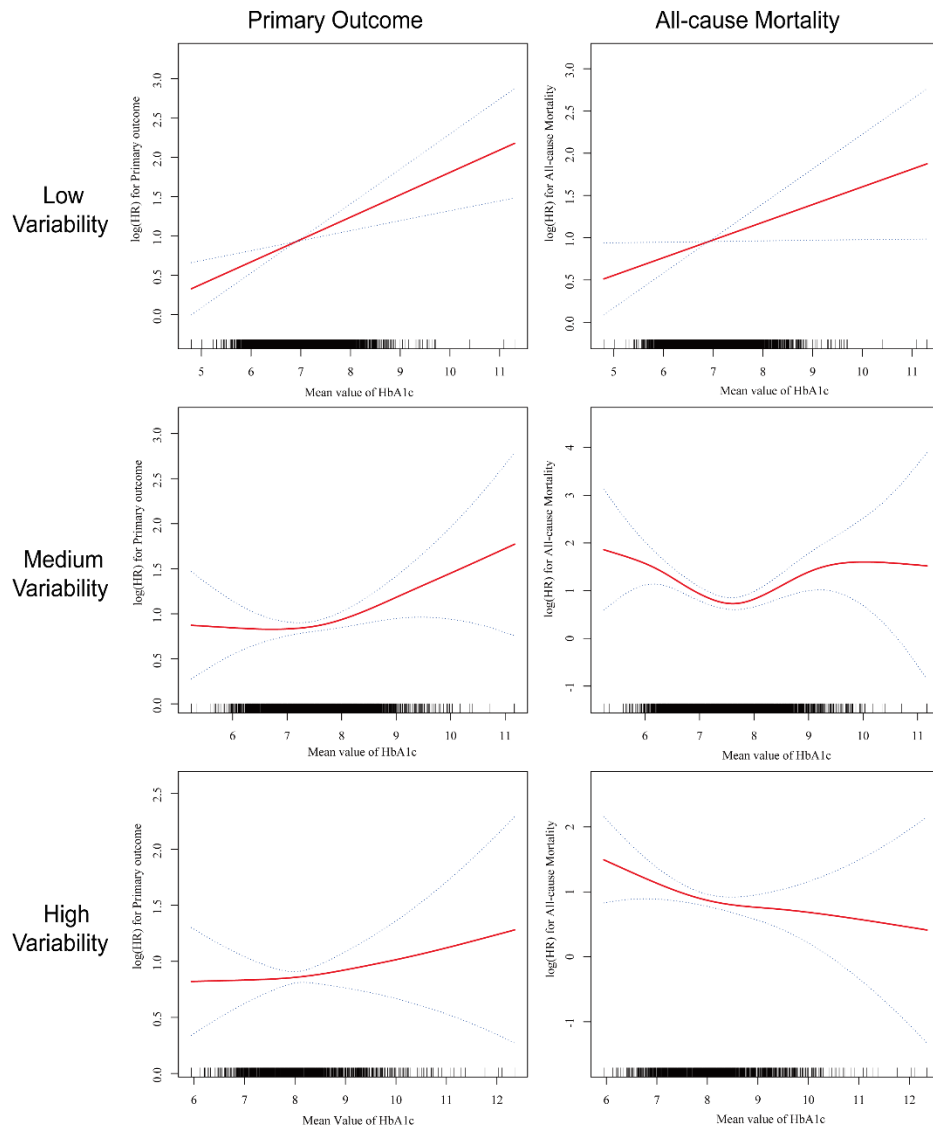

**Figure S6. Association between the mean HbA1c value from all visits and the risk of primary outcome and all-cause mortality stratified by HbA1c variability.**

The solid red line represents the estimated hazard ratio, while the dotted blue line indicates the 95% confidence interval.
